# Supplementary material for: Macrophage-derived pro-inflammatory cytokines augment the cytotoxicity of cytokine-induced killer cells by strengthening the NKG2D pathway in multiple myeloma
Source: Springer Nature journal article supplement (doi:10.1038/s41598-025-99289-x), 2025-05-14

Supplementary Figure 1

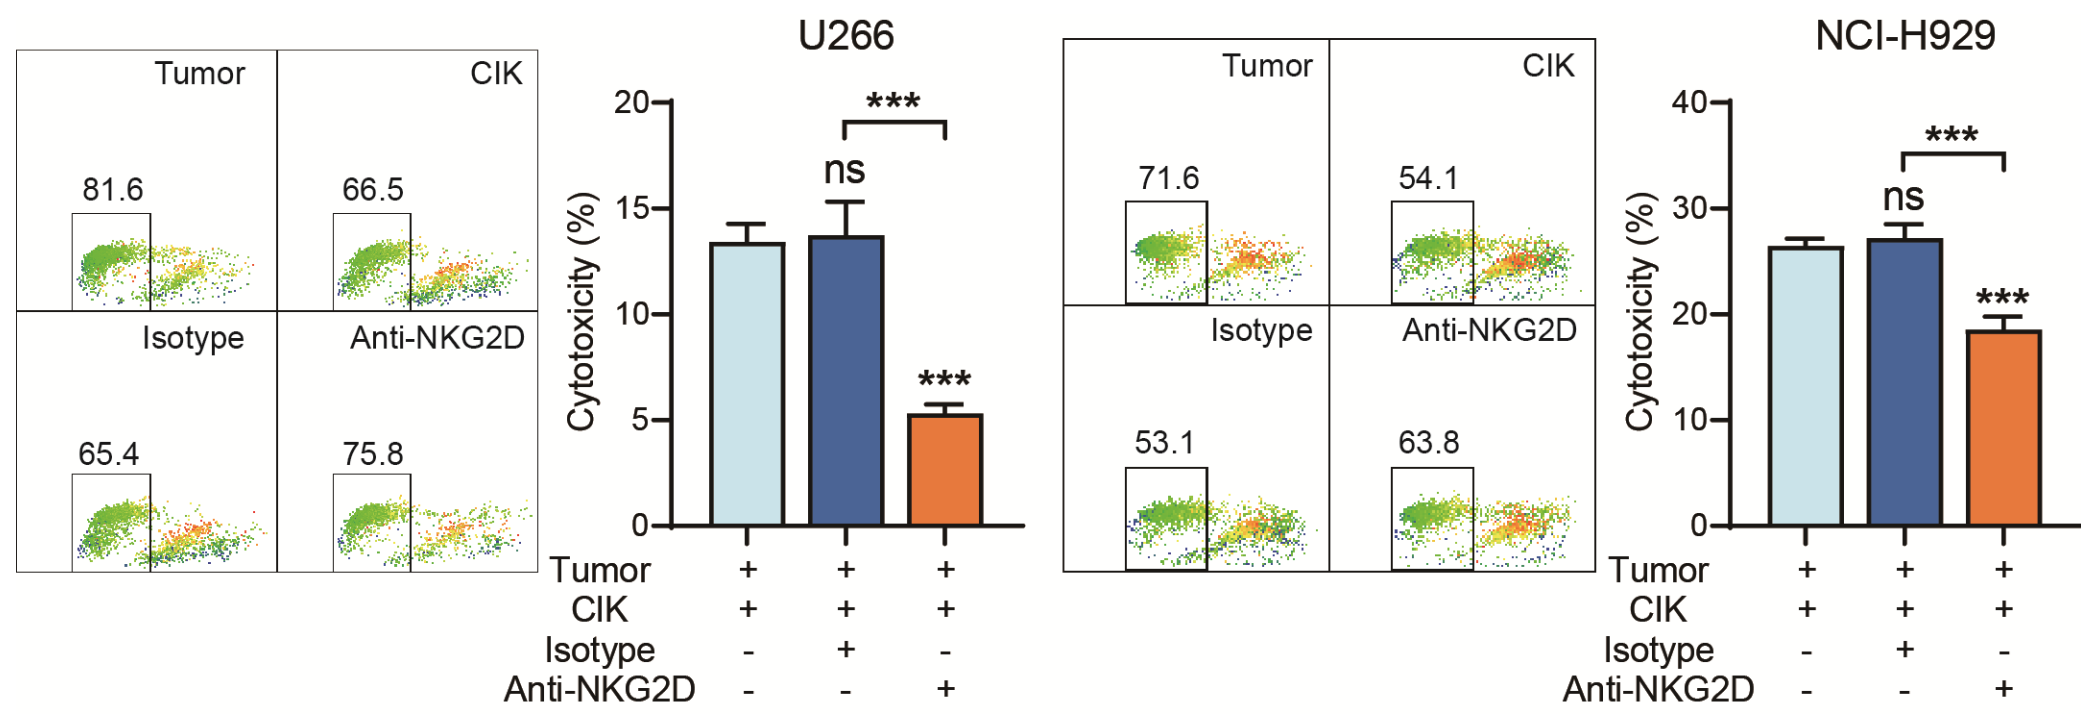

Supplementary Figure 2

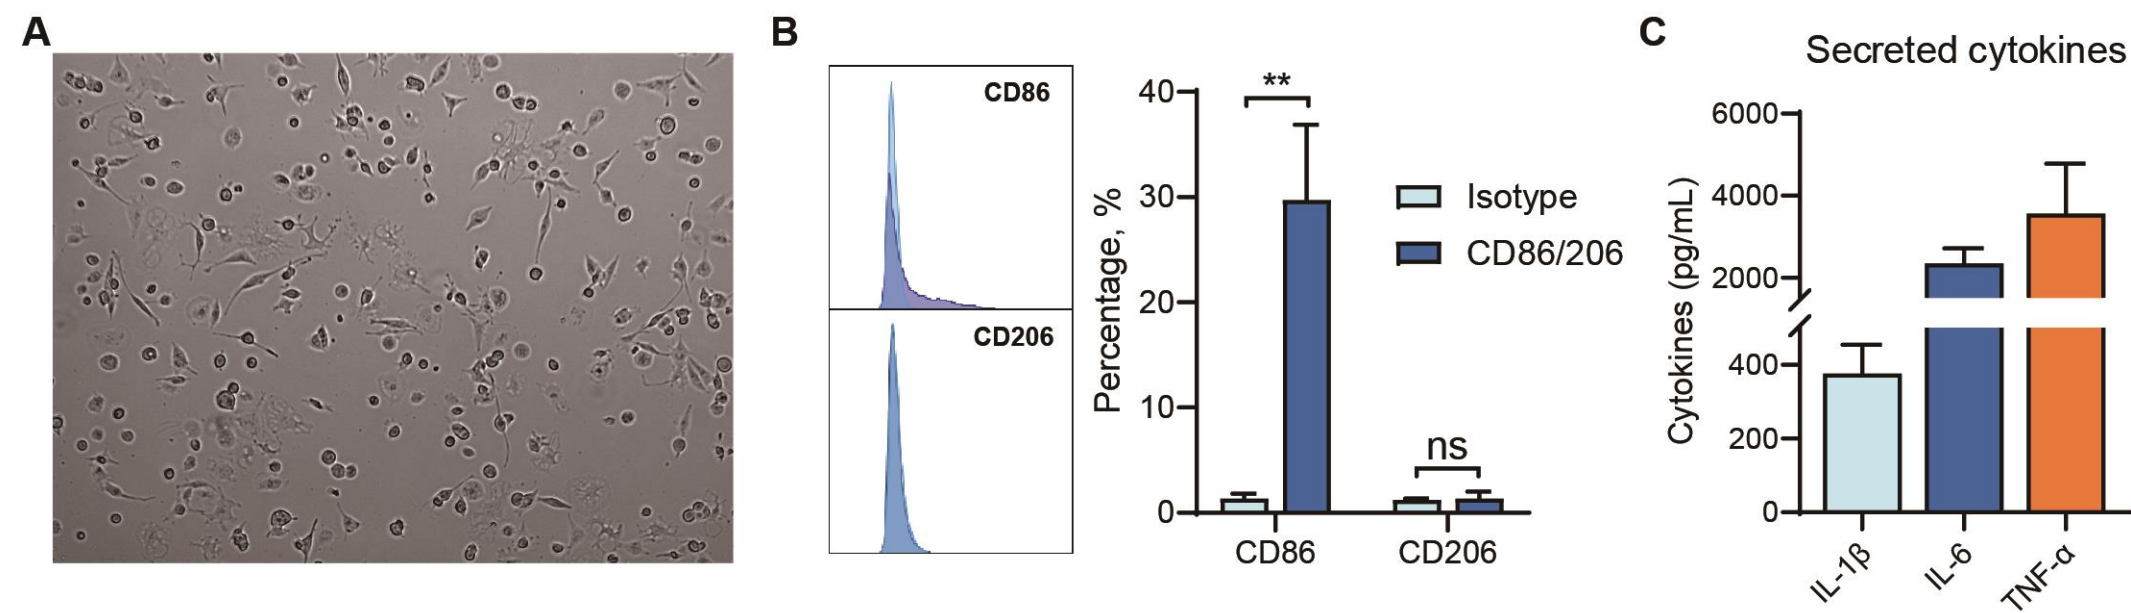

Supplement: MOESM1 [file 41598_2025_99289_MOESM1_ESM.pdf]
